# Supplementary material
Source: PubMed Central journal article supplement (PMC7056551)
Supplement: NIHMS1548337-supplement-1.pdf [file NIHMS1548337-supplement-1.pdf]

## Supplementary figure S1

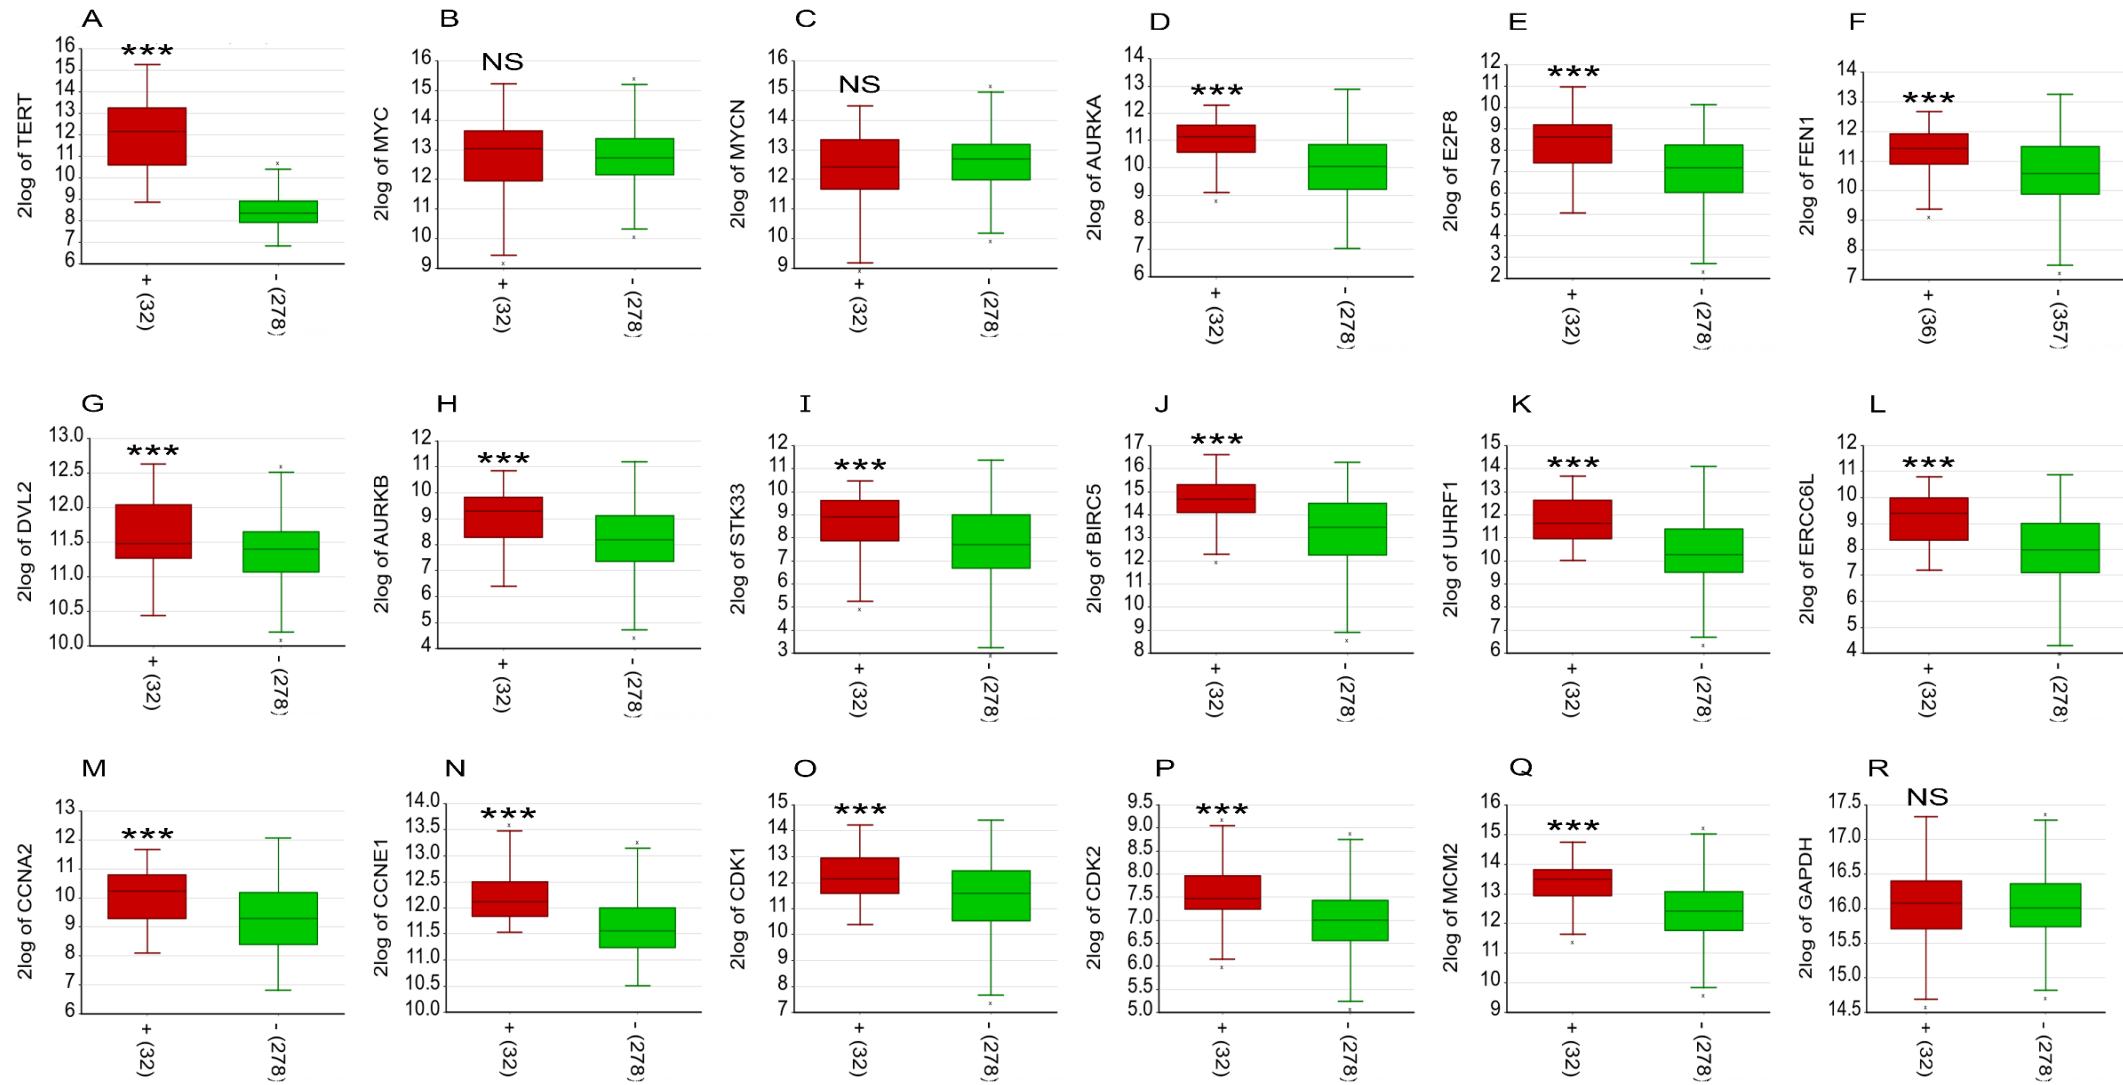

**Supplementary Fig. S1.** Elevated mRNA expression of *TERT* and *TERT*-associated genes in NB with *TERT* gene rearrangement. A total of 310 NB patients without *MYCN* amplification within the Tumor Neuroblastoma (*TERT*)-Fischer-394-custom dataset were assigned into two subgroups: 32 patients with (+) and 278 patients without (-) *TERT* gene rearrangement. The mRNA expression obtained from Microarray analysis between the two subgroups were analyzed within the R2 platform server. (A-R) Dot plots showing mRNA expression levels of *TERT* and multiple *TERT*-associated genes. Each dot represents a value from an individual patient.

## Supplementary figure S2

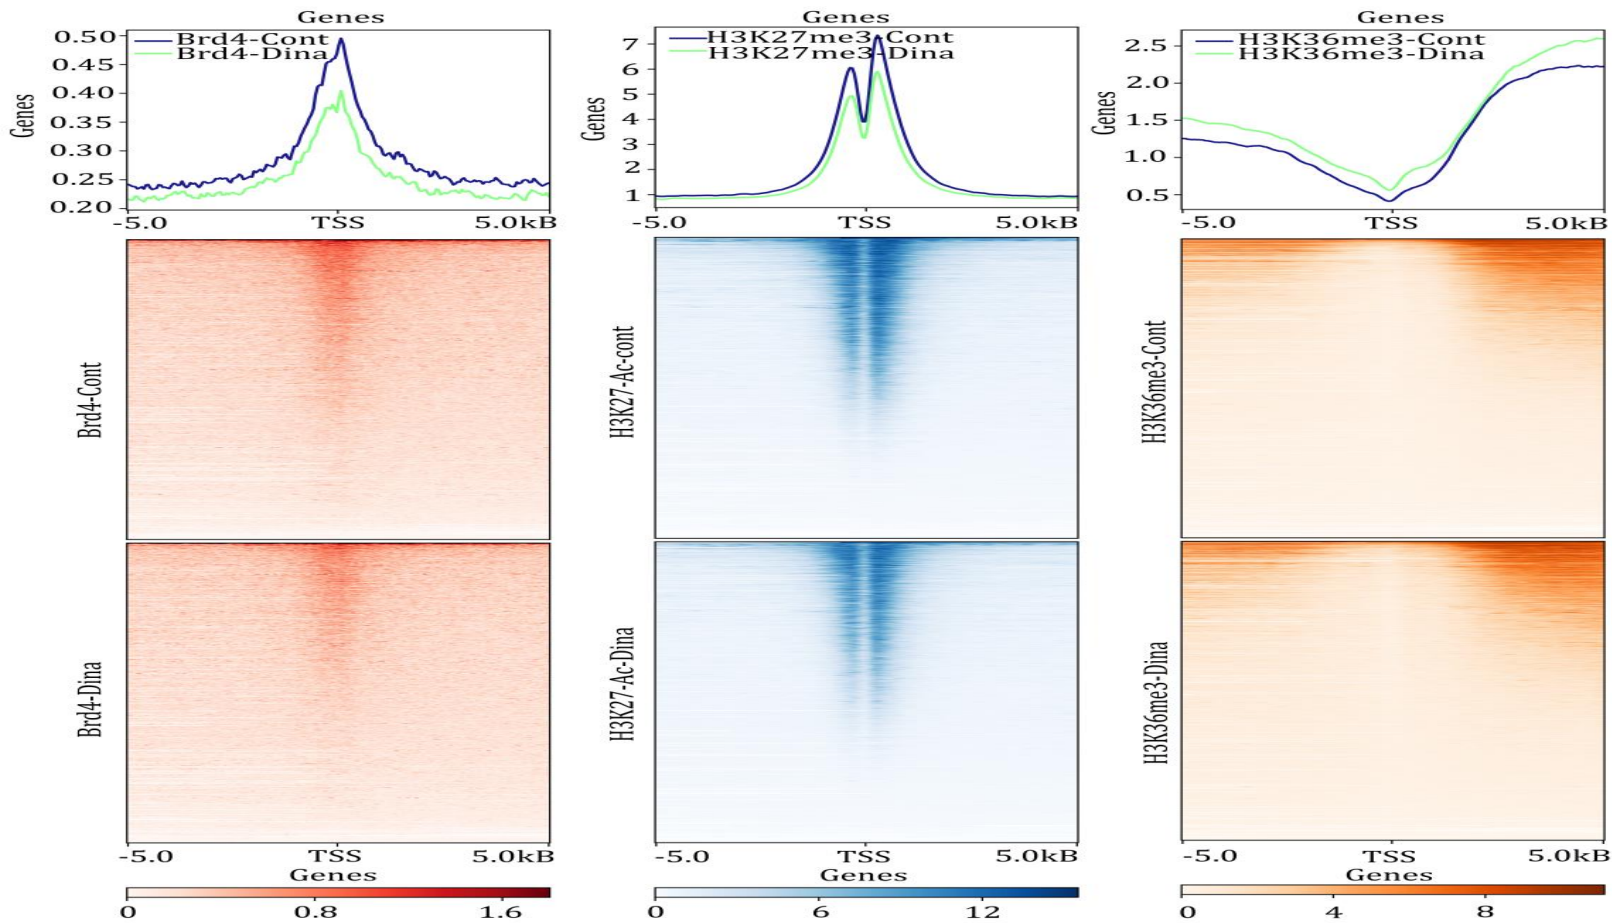

**Supplementary Fig. S2.** Effects of dinaciclib on genome-wide chromatin occupancy of epigenetic modulators in CLB-GA cells. The binding profiles for Brd4, H3K27Ac, and H3K36me3 were examined in the presence or absence of dinaciclib at 10 nM for 8 h using computeMatrix in reference-point mode. The density and composite mapping relative to the reference genomic positions before (5 kb upstream) and after (5 kb downstream) the TSS with 50 bp bins were shown. The top panel histograms show the average genome-wide occupancies surrounding the TSS in the presence or absence of dinaciclib. The lower panels of density heat maps show genome-wide chromatin occupancy and effects of dinaciclib.

### Supplementary figure S3

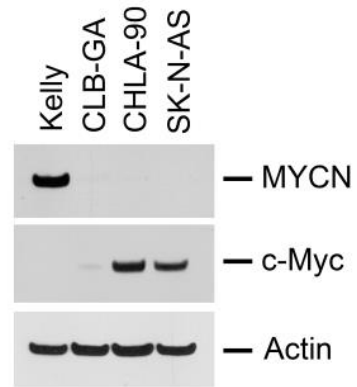

**Supplementary Fig. S3:** C-Myc and MYCN protein expression in four NB cell lines. Western blotting of c-Myc, MYCN, and actin in Kelly, CLB-GA, CHLA-90, and SK-N-AS cell lines.

## Supplementary figure S4

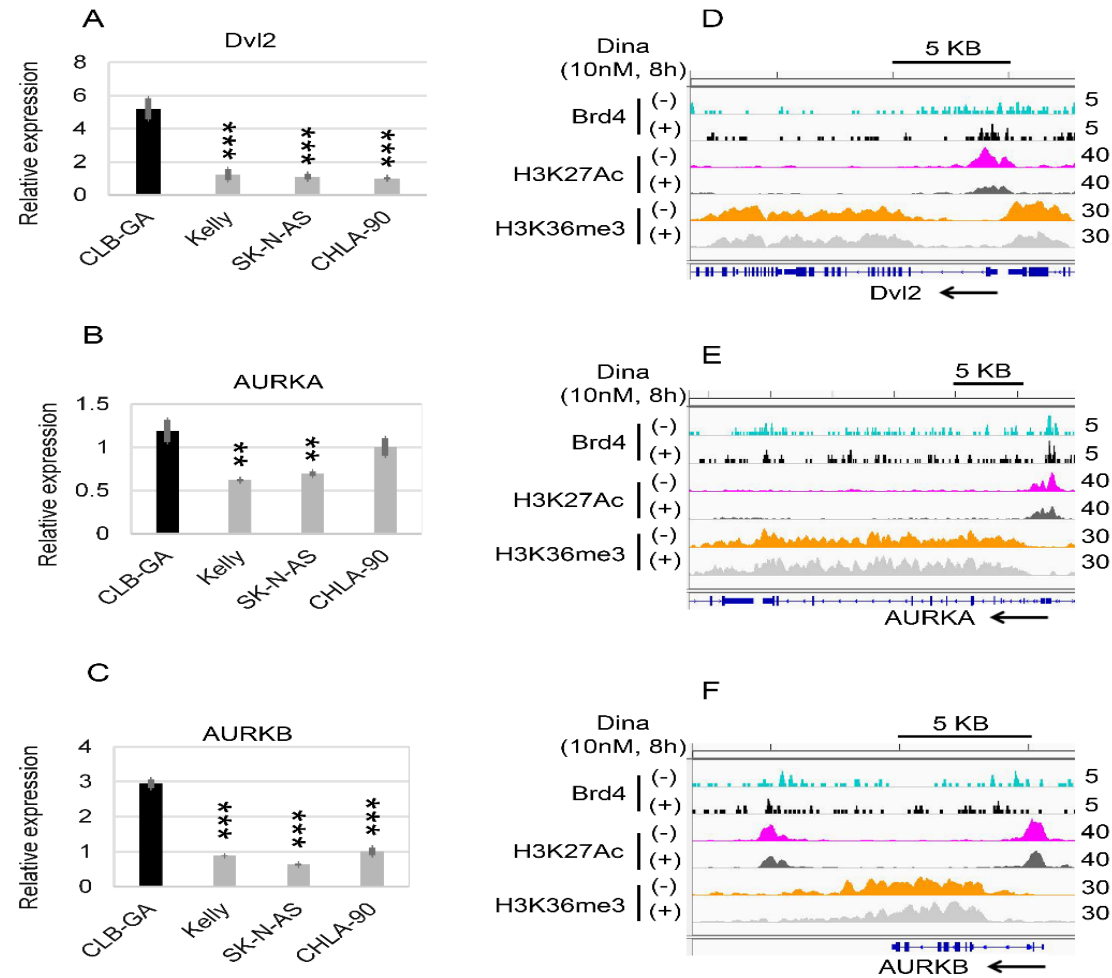

**Supplementary Fig. S4:** Effects of dinaciclib on the chromatin occupancy of epigenetic modulators at *Dvl2*, *AURKA*, and *AURKB* and in CLB-GA cells. (A-C) Comparison of mRNA expression of *Dvl2* (A), *AURKA* (B), and *AURKB* (C) in human NB cell lines CLB-GA, Kelly, SK-N-AS, and CHLA-90. (D-F) Effects of dinaciclib on binding of Brd4, H3K27Ac, and H3K36me3 to the promoters or enhancers of *Dvl2*, *AURKA*, and *AURKB* in CLB-GA cells. Cells were treated with dinaciclib at 10 nM and 100 nM for 8 h, followed by CHIP-seq analysis.

**Supplementary figure S5**

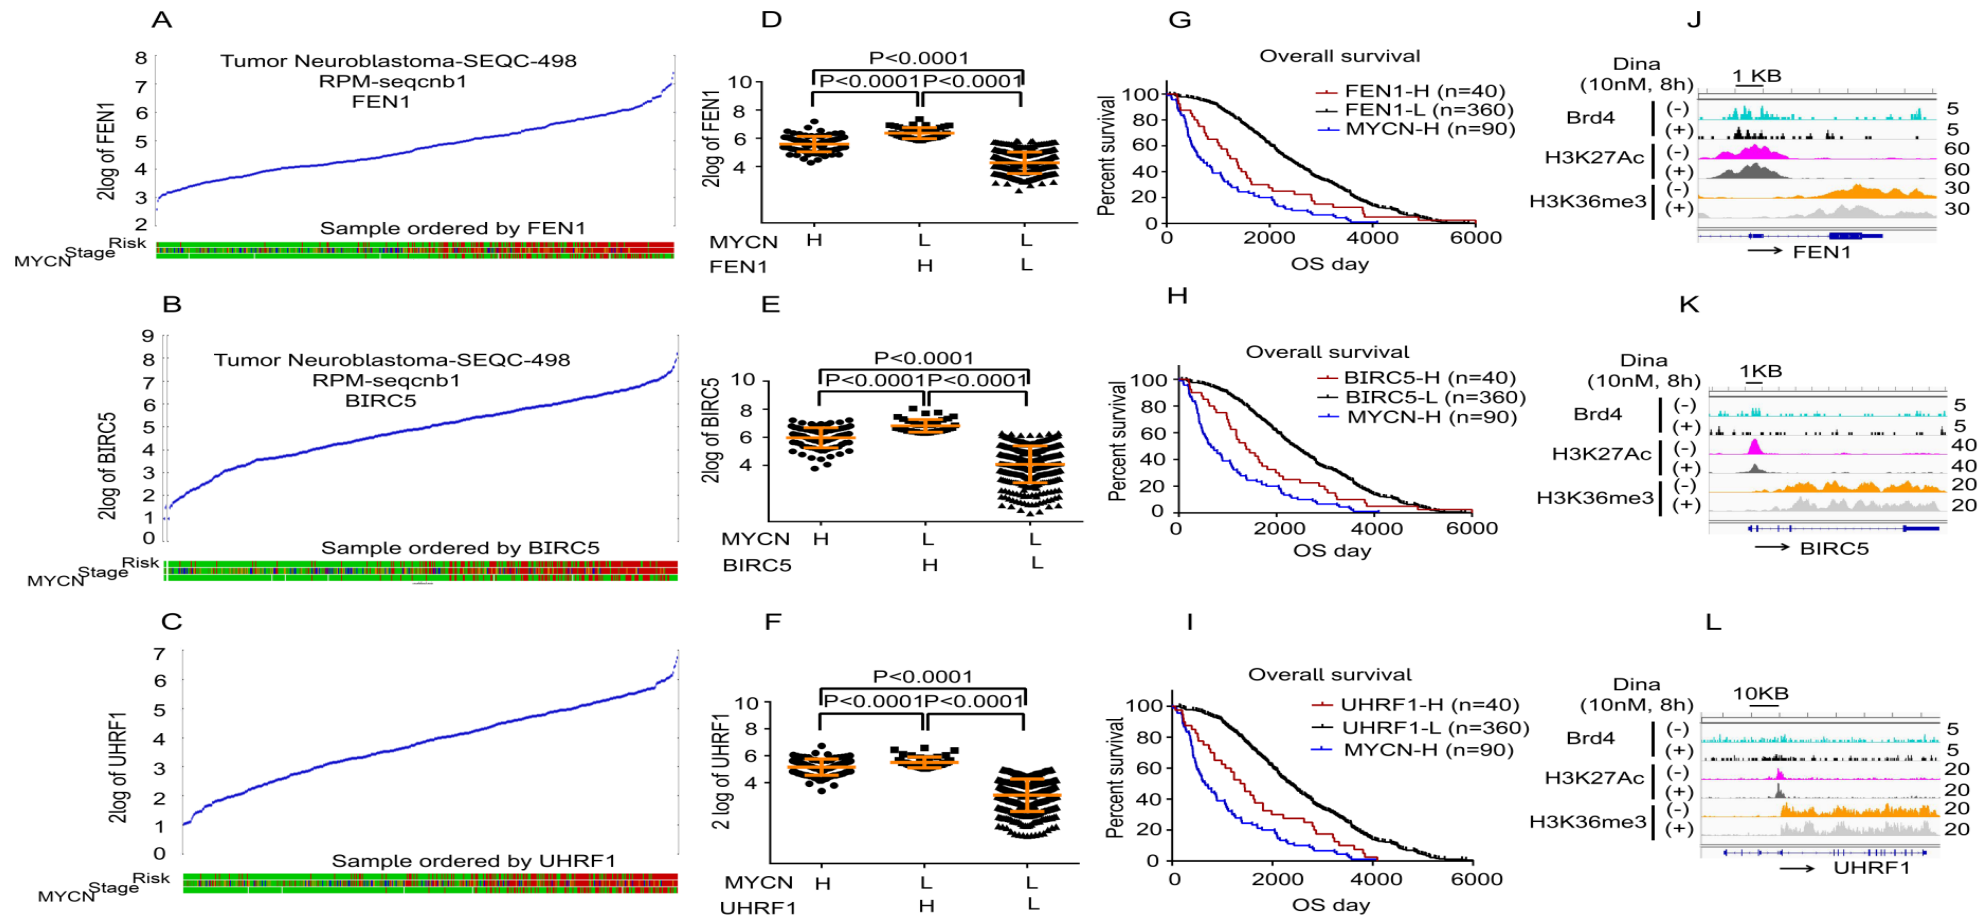

**Supplementary Fig. S5.** Association of overexpression of *FEN1*, *BIRC5*, and *UHRF1* with poor prognosis and effects of dinaciclib on chromatin occupancy of epigenetic modulators in CLB-GA cells. (A-C) Association of high mRNA expression of *FEN1*, *BIRC5*, and *UHRF1* with high risk and advanced stage of NB in a subpopulation of NB expressing high levels of *FEN1* (A), *BIRC5* (B), and *UHRF1* (C) in the GSE62564 dataset as analyzed with R2 genomics analysis and visualization application platform. (D-F) Dot plots showing the mRNA expression levels of *FEN1*, *BIRC5*, and *UHRF1* in *MYCN*-H subgroup (n=90), *FEN1*/*BIRC5*/*UHRF1* high (top 10%, n=40), and *MYCN*-L plus *FEN1*/*BIRC5*/*UHRF1* low (n=360). Each dot represents a value from an individual patient. (G-I) Comparison of the overall survival among the above subpopulations of NB patients. (J-L) Effects of dinaciclib on binding of Brd4, H3K27Ac, and H3K36me3 to the promoters or enhancers of *FEN1*/*BIRC5*/*UHRF1*. CLB-GA cells were treated in the absence or presence of 10 nM dinaciclib for 8 h, followed by ChIP-seq. Genome browser (hg38) views of ChIP-seq peaks at various gene loci.

## Supplementary figure S6

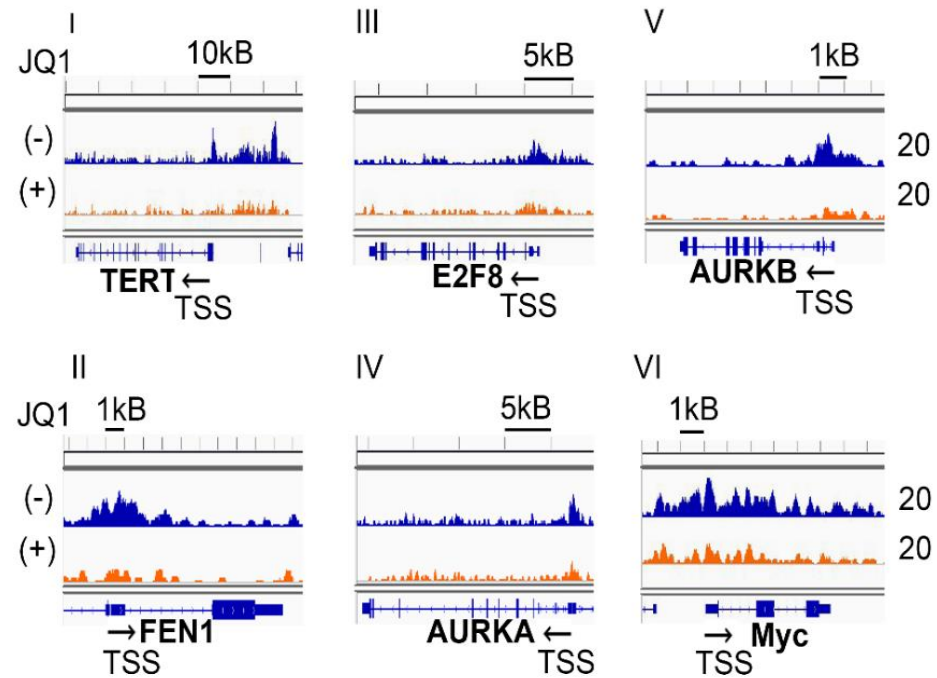

**Supplementary Fig. S6.** JQ1 sensitive Brd4 binding profiles in OCI-AML3 cells. Effects of JQ1 on Brd4 binding to the promoters or enhancers of *TERT*, *E2F8*, *FEN1*, *AURKA*, and *AURKB* in NPMc+ OCI-AML cells with active Brd4 pathways. Analysis was performed using ChIP -seq data, previously published and deposited at GEO with accession number GSE104745(25). Cells were treated in the absence or presence of 0.5  $\mu$ M JQ1 for 24 h, followed by Brd4-ChIP-seq. Genome browser (hg38) views of ChIP-seq peaks at the following loci. The location of each gene is shown at the bottom of the panels and the calculated ChIP-seq enrichment values are indicated on the right.

## Supplementary figure S7

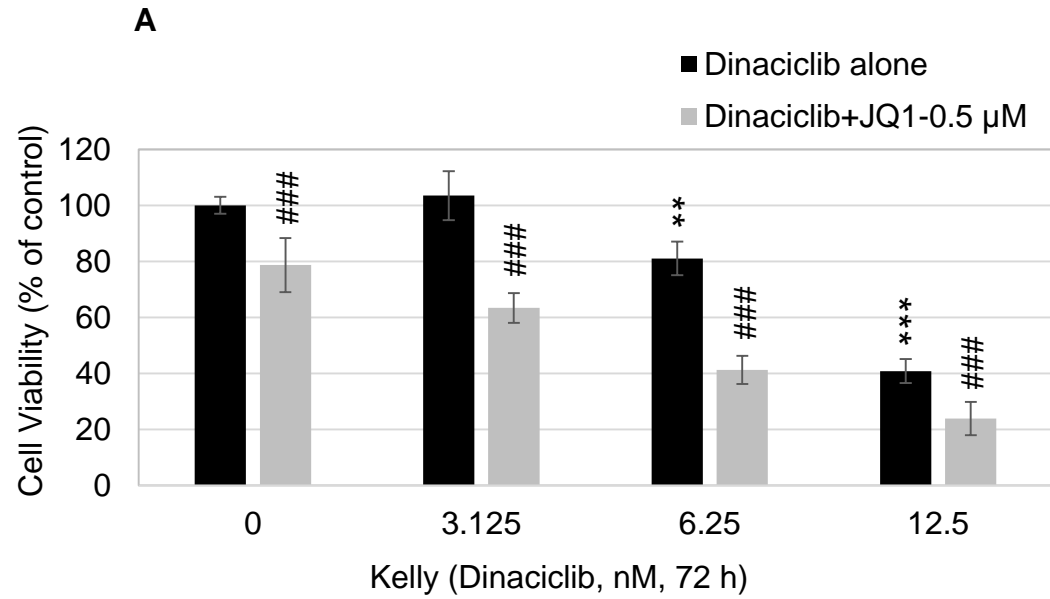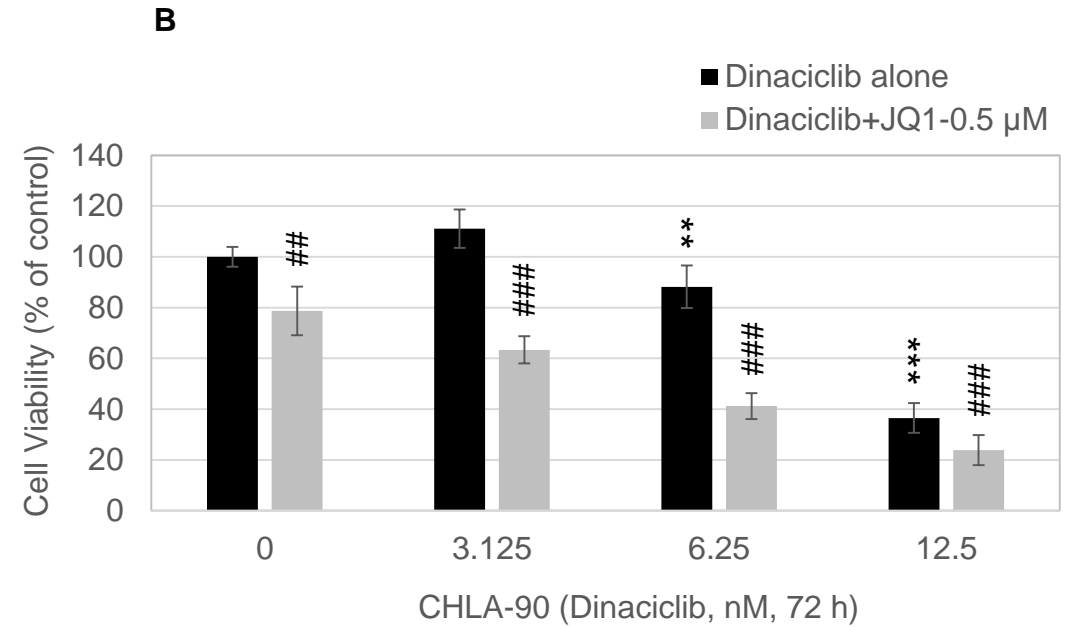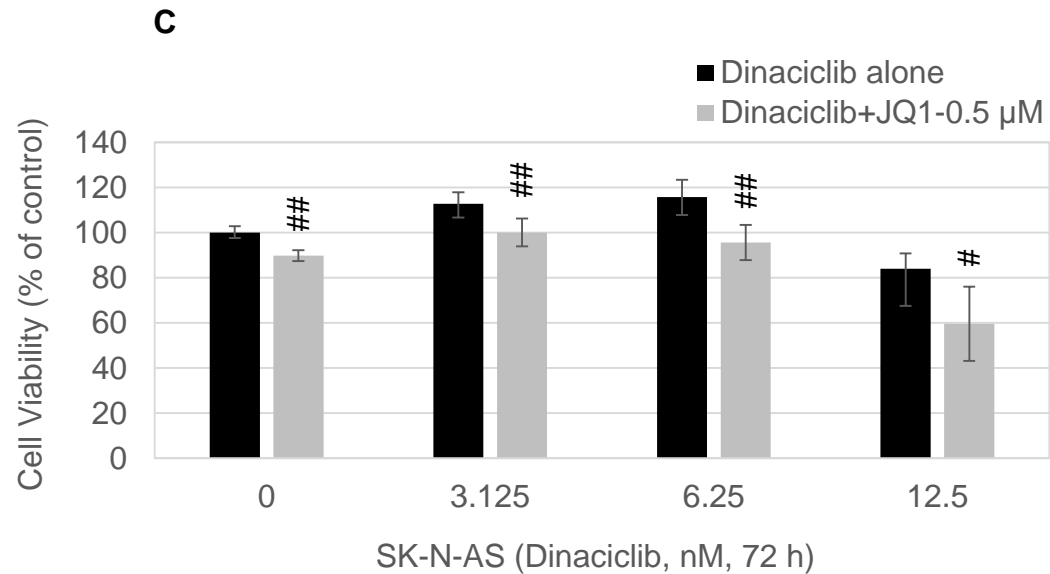

**Supplementary Fig. S7.** JQ1 and dinaciclib are synergistic or additive in inducing cytotoxicity in NB cell lines. **(A, B, C)** Synergistic or additive effects of JQ1/AZD5153 in combination with dinaciclib. Kelly, SK-N-AS, and CHLA-90 cells were treated with JQ1, AZD5153, or dinaciclib alone or combination at the indicated concentrations for 72 h, followed by MTS assay. Asterisk or Hash is in relation to control or dinaciclib treatment alone, respectively.

## Supplementary figure S8

### Combination index (CI) values for synergy experiment combining Dinaciclib with Brd4 inhibitor JQ1

| NB cells    | Dinaciclib (nM) | JQ1 (uM) | Fa   | CI      |
|-------------|-----------------|----------|------|---------|
| CLB-GA      | 1.562           | 0.5      | 0.28 | 2.5621  |
|             | 3.125           | 0.5      | 0.35 | 1.05784 |
|             | 6.25            | 0.5      | 0.59 | 0.43967 |
|             | 12.5            | 0.5      | 0.64 | 0.77836 |
| Kelly       | 1.562           | 0.5      | 0.18 | 1.04492 |
|             | 3.125           | 0.5      | 0.37 | 0.53231 |
|             | 6.25            | 0.5      | 0.53 | 0.54914 |
|             | 12.5            | 0.5      | 0.76 | 0.62749 |
| CHLA-90     | 1.562           | 0.5      | 0.11 | 0.63388 |
|             | 3.125           | 0.5      | 0.11 | 0.87632 |
|             | 6.25            | 0.5      | 0.19 | 1.04526 |
|             | 12.5            | 0.5      | 0.69 | 0.79491 |
| SK-N-AS     | 1.562           | 0.5      | 0.04 | 0.88855 |
|             | 3.125           | 0.5      | 0.04 | 1.11201 |
|             | 6.25            | 0.5      | 0.04 | 1.55878 |
|             | 12.5            | 0.5      | 0.41 | 0.66995 |
| ST16-PDX703 | 1.562           | 0.5      | 0.69 | 1.22675 |
|             | 3.125           | 0.5      | 0.74 | 0.88005 |
|             | 6.25            | 0.5      | 0.77 | 0.79571 |
|             | 12.5            | 0.5      | 0.85 | 0.58324 |

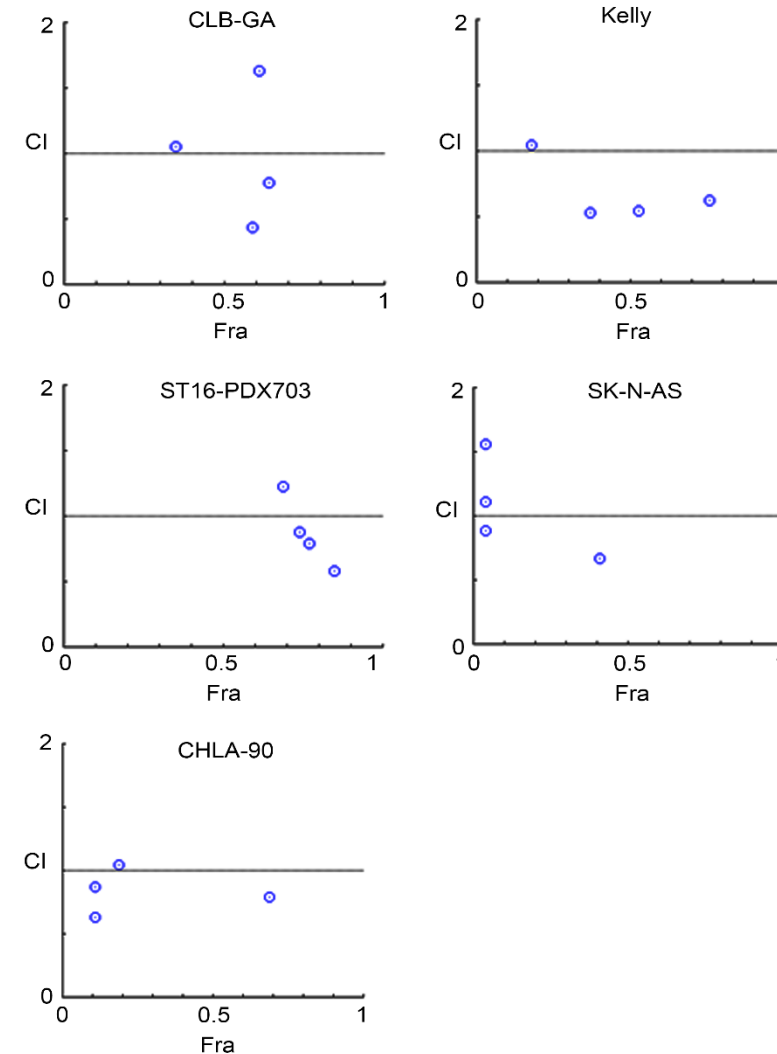

**Supplementary Fig. S8.** Combination index (CI) values for synergy experiment combining Dinaciclib with Brd4 inhibitor JQ1. The CI was analyzed using CalcuSyn software (Version 2; Biosoft). The CI values of <1, =1, and >1 indicate synergism, additive effect, and antagonism of drugs, respectively. CI table (left) and synergy plots (right) for combining Dinaciclib with Brd4 inhibitor JQ1 in four NB cell lines and primary NB cells. Fa: Fraction of cell growth inhibited.



## Supplementary figure S9

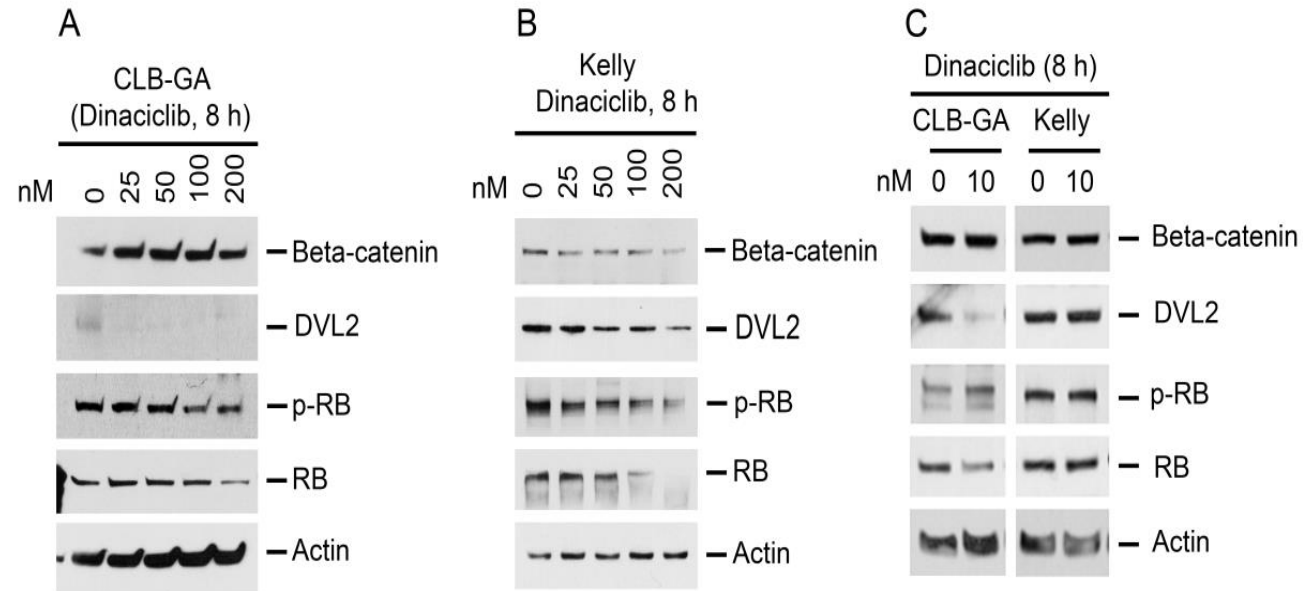

**Supplementary Fig. S9.** Effects of dinaciclib on phosphorylation of Rb in CLB-GA and Kelly cells. CLB-GA cells were treated with dinaciclib at indicated concentrations for 8 h, followed by Western blotting of p-Rb, Rb, and actin.

**Supplementary table S1. Primer sequences used in CHIP-qPCR and real-time RT-PCR analysis**

| <b>CHIP-qPCR primers</b> |                                |                                |                     |
|--------------------------|--------------------------------|--------------------------------|---------------------|
|                          | Forward Sequence               | Reverse sequence               | Size of PCR product |
| TERT-P1                  | 5'-GCGGCGCGAGTTTCAG-3'         | 5'-AGCACCTCGCGGTAGTGG-3'       | 158 bp              |
| TERT-P2                  | 5'-GTCCTGCCTGAAGGAGCTG-3'      | 5'-ACCGTGTTGGGCAGGTAG-3'       | 159 bp              |
| TERT-P3                  | 5'-CTGATTGGCACCTCATGTTG-3'     | 5'-GACCCTCCTTGGGAATAGGA-3'     | 181 bp              |
| E2F8-P1                  | 5'-GCTGAACTTTTCCCCCAACT-3'     | 5'-CCCCCGATTTGAAATTAACC-3'     | 200 bp              |
| E2F8-P2                  | 5'-GTTGTCCTGGAAACCACGAT-3'     | 5'-CCCAATAAGGCAAGCAGGTA-3'     | 150 bp              |
| <b>RT-qPCR primers</b>   |                                |                                |                     |
| FEN1                     | 5'-ACATGGACTGCCTCACCTTC-3'     | 5'-CCCAATACCCCGGATACTCT-3'     | 191 bp              |
| MycN-E2E3                | 5'-CACAAGGCCCTCAGTACCTC-3'     | 5'-ACCACGTCGATTTCTTCCTC-3'     | 95 bp               |
| MycN-E3                  | 5'-CTTCGGTCCAGCTTTCTCAC-3'     | 5'-GTCCGAGCGTGTTCAATTTT-3'     | 200 bp              |
| AURKA                    | TCCTGAGGAGGAACTGGCATCAAA       | TACCAGAGGGCGACCAATTTCAA        | 96 bp               |
| AURKB                    | ATCAGCTGCGCAGAGAGATCGAAA       | CTGCTCGTCAAATGTGCAGCTCTT       | 167 bp              |
| TERT                     | CCAAGTTCCTGCACTGGCTGA          | TTCCCGATGCTGCCTGAC             | 207 bp              |
| Dvl2                     | 5'-GCCTATCCAGGTTCCCTCCTC-3'    | 5'-AGAGCCAGTCAACCACATCC-3'     | 214 bp              |
| Myc                      | 5'-CTTCTCTCCGTCCTCGGATTCT-3'   | 5'-GAAGGTGATCCAGACTCTGACCTT-3' | 203 bp              |
| CCNA2                    | 5'-TGGAAGCAAACAGTAAACAGCC-3'   | 5'-GGGCATCTTCACGCTCTATTT-3'    | 103 bp              |
| CCND1                    | 5'-GCTCCTGTGCTGCGAAGT-3'       | 5'-TGTTCCCTCGCSGACCTCCAG-3'    | 201 bp              |
| CCNE1                    | 5'-ACTCAACGTGCAAGCCTCG-3'      | 5'-GCTCAAGAAAGTGCTGATCCC-3'    | 141 bp              |
| MCM2                     | 5'-ATGGCGGAATCATCGGAATCC-3'    | 5'-GGTGAGGGCATCAGTACGC-3'      | 120 bp              |
| Cdk1                     | 5'-CAGACTAGAAAGTGAAGAGGAAGG-3' | 5'-ACTGACCAGGAGGGATAGAATC-3'   | 191 bp              |
| Cdk2                     | 5'-CCAGGAGTTACTTCTATGCCTGA-3'  | 5'-TTCATCCAGGGGAGGTACAAC-3'    | 110 bp              |
| GAPDH                    | 5'-CCCCTTCATTGACCTCAACTACAT-3' | 5'-CGCTCCTGGAAGATGGTGA-3'      | 135 bp              |

**Supplementary table 2. Gene sets enriched in NB patients with *TERT* gene rearrangement (n=32) versus without *TERT* gene rearrangement (n=278) within *MYCN* non-amplified NB of Tumor Neuroblastoma (*TERT*)-Fischer-394-custom**

| <b>A. Enriched gene set (db:geneset_broad_2015_oncogenic)</b> | <b>Genes</b> | <b>Genes increased</b> | <b>P value</b> |
|---------------------------------------------------------------|--------------|------------------------|----------------|
| H Broad Institute:RPS14_DN_V1_DN                              | 181          | 40                     | 2.4E-20        |
| H Broad Institute:CSR_LATE_UP_V1_UP                           | 168          | 38                     | 4.4E-20        |
| H Broad Institute:PRC2_EZH2_UP_V1_UP                          | 188          | 37                     | 1.2E-15        |
| H Broad Institute:PRC2_EDD_UP_V1_UP                           | 190          | 31                     | 1.4E-09        |
| H Broad Institute:VEGF_A_UP_V1_DN                             | 191          | 31                     | 1.8E-09        |
| H Broad Institute:HOXA9_DN_V1_DN                              | 184          | 28                     | 1.1E-07        |
| H Broad Institute:MYC_UP_V1_UP                                | 167          | 26                     | 1.7E-07        |
| H Broad Institute:EGFR_UP_V1_DN                               | 189          | 24                     | 0.000099       |
| H Broad Institute:E2F3_UP_V1_UP                               | 183          | 18                     | 0.03           |

  

| <b>B. Enriched gene sets (db:geneset_broad_2015_curated)</b>             | <b>Genes</b> | <b>Genes increased</b> | <b>P value</b> |
|--------------------------------------------------------------------------|--------------|------------------------|----------------|
| H Broad Institute:REN_BOUND_BY_E2F                                       | 61           | 35                     | 7.40E-60       |
| Broad Institute:EGUCHI_CELL_CYCLE_RB1_TARGETS                            | 23           | 19                     | 2.80E-49       |
| Broad Institute:CHICAS_RB1_TARGETS_GROWING                               | 235          | 45                     | 4.10E-16       |
| Broad Institute:FEVR_CTNNB1_TARGETS_DN                                   | 543          | 112                    | 8.20E-45       |
| Broad Institute:DAIRKEE_TERT_TARGETS_UP                                  | 360          | 41                     | 6.30E-05       |
| H Dana-Farber Cancer Institute:ZHOU_CELL_CYCLE_GENES_IN_IR_RESPONSE_24HR | 127          | 64                     | 1.50E-93       |
| Reactome:REACTOME_CELL_CYCLE_MITOTIC                                     | 305          | 83                     | 3.10E-52       |
| Reactome:REACTOME_DNA_REPLICATION                                        | 186          | 61                     | 1.60E-50       |
| Broad Institute:ODONNELL_TARGETS_OF_MYC_AND_TFRC_DN                      | 45           | 22                     | 6.20E-31       |
| Broad Institute:ODONNELL_TFRC_TARGETS_DN                                 | 131          | 45                     | 7.60E-40       |

**Supplementary Table S2.** The significantly enriched gene sets in NB with *TERT* gene rearrangement. A total of 310 NB patients without *MYCN* amplification within the Tumor Neuroblastoma (*TERT*)-Fischer-394-custom dataset were assigned into two subgroups: 32 patients with *TERT* gene rearrangement and 278 patients without *TERT* gene rearrangement. By analyzing the subgroups of *MYCN* non-amplified NB patients with or without *TERT* rearrangement within R2 platform, the significantly enriched gene sets in the NB patients with *TERT* rearrangement were listed in A (database:geneset\_broad\_2015\_oncogenic) and B (database:geneset\_broad\_2015\_curated).

**Supplementary table 3. Gene sets enriched in NB patients with high versus low *TERT* within Tumor Neuroblastoma Gene-TARGET-161**

| <b>A. Enriched gene set (db:geneset_broad_2015_oncogenic)</b>              | <b>Genes</b> | <b>Genes increased</b> | <b>P value</b> |
|----------------------------------------------------------------------------|--------------|------------------------|----------------|
| H Broad Institute:RPS14_DN_V1_DN                                           | 181          | 53                     | 1.4e-16        |
| H Broad Institute:CSR_LATE_UP_V1_UP                                        | 168          | 47                     | 1.6e-13        |
| H Broad Institute:PRC2_EZH2_UP_V1_UP                                       | 188          | 39                     | 9.2e-12        |
| H Broad Institute:PRC2_EDD_UP_V1_UP                                        | 190          | 48                     | 1.4E-09        |
| H Broad Institute:VEGF_A_UP_V1_DN                                          | 191          | 41                     | 5.5e-07        |
| H Broad Institute:HOXA9_DN_V1_DN                                           | 184          | 32                     | 3.3e-03        |
| H Broad Institute:MYC_UP_V1_UP                                             | 167          | 40                     | 7.1e-08        |
| Broad Institute:CAMP_UP_V1_UP                                              | 194          | 34                     | 1.6e-03        |
| Broad Institute:TBK1_DF_DN                                                 | 277          | 44                     | 2.7e-03        |
| <b>B. Enriched gene sets (db:geneset_broad_2015_curated)</b>               | <b>Genes</b> | <b>Genes increased</b> | <b>P value</b> |
| H Broad Institute:REN_BOUND_BY_E2F                                         | 61           | 36                     | 1.2e-35        |
| Broad Institute:EGUCHI_CELL_CYCLE_RB1_TARGETS                              | 23           | 16                     | 2.2e-19        |
| National Cancer Institute and Nature Publishing Group:PID_E2F_PATHWAY      | 74           | 27                     | 1.8e-03        |
| Reactome:REACTOME_E2F_MEDIATED_REGULATION_OF_DNA_REPLICATION               | 31           | 16                     | 3.6e-13        |
| Broad Institute:OLSSON_E2F3_TARGETS_DN                                     | 47           | 14                     | 3.3e-05        |
| Broad Institute:CHICAS_RB1_TARGETS_LOW_SERUM                               | 95           | 31                     | 2.6e-12        |
| Broad Institute:FEVR_CTNNB1_TARGETS_DN                                     | 543          | 147                    | 1.1e-38        |
| Reactome:REACTOME_SIGNALING_BY_WNT                                         | 63           | 13                     | 0.01           |
| Broad Institute:DAIRKEE_TERT_TARGETS_UP                                    | 360          | 91                     | 9.6e-20        |
| NCI, NIH and Nature Publishing Group:PID_TELOMERASE_PATHWAY                | 68           | 12                     | 5.7e-03        |
| H Dana-Farber Cancer Institute:ZHOU_CELL_CYCLE_GENES_IN_IR_RESPONSE_24HR   | 127          | 72                     | 8.4e-65        |
| Reactome: REACTOME_CELL_CYCLE_MITOTIC                                      | 305          | 105                    | 5.9e-44        |
| Reactome:REACTOME_DNA_REPLICATION                                          | 186          | 79                     | 3.2e-47        |
| Broad Institute:ODONNELL_TARGETS_OF_MYC_AND_TFRC_DN                        | 45           | 26                     | 1.4e-24        |
| Broad Institute:ODONNELL_TFRC_TARGETS_DN                                   | 131          | 54                     | 2.3e-30        |
| National Cancer Institute and Nature Publishing Group:PID_AURORA_B_PATHWAY | 37           | 17                     | 1.9e-11        |

**Supplementary Table S3.** The significantly enriched gene sets in NB with high *TERT* expression. A total of 161 NB patients within the Tumor Neuroblastoma Gene-TARGET-161 dataset were assigned into subgroups with *TERT* high versus low automatically within the R 2 Genomics analysis platform, the significantly enriched gene sets in the NB patients with high *TERT* expression were listed in A (database:geneset\_broad\_2015\_oncogenic) and B (database:geneset\_broad\_2015\_curated).

**Supplementary table 4: Information on patient samples used in this study**

| Sample ID |           | Age   | Disease status       | Risk | BM Metastasis | MNCs/per ml BM      | Stage | MYCN Amp | Chemotherapy              |
|-----------|-----------|-------|----------------------|------|---------------|---------------------|-------|----------|---------------------------|
| ST15      | TC PB4044 | 18Y M | Dx                   | VLR  | NA            | NA                  | 1     | (-)      | None                      |
|           |           |       |                      |      |               |                     |       |          |                           |
| ST16      | TC BM4045 | 3Y    | Dx Refractory        | HR   | BM metastasis | NA                  | IV    | (+)      | None                      |
|           |           |       |                      |      |               |                     |       |          |                           |
| ST36      | BM4091    | 2Y    | Dx Refractory        | HR   | BM metastasis | 17X10 <sup>6</sup>  | IV    | (-)      | None                      |
|           | BM4117    |       |                      |      | BM metastasis | 6.8X10 <sup>6</sup> |       |          | d20 Cycle 4-ANBL0532-IND  |
|           | BM4143    |       |                      |      | No            | 0.6X10 <sup>6</sup> |       |          | Post Cycle 6-ANBL0532-IND |
| ST5       | BM4130    | 5Y    | Relapsed Refractory  | HR   | BM metastasis | 6.6X10 <sup>6</sup> | IV    | (-)      | Post cycle 4 ANBL0532     |
| ST53      | BM4129    | 18Y   | Relapsed, Refractory | HR   | BM metastasis | 15X10 <sup>6</sup>  | IV    | (-)      | New relapse               |
